# Supplementary material for: Photochemically Induced Self-Healing in a Cadmium(II) Coordination Crystal
Source: Research Square preprint supplement (doi:10.21203/rs.3.rs-7925623/v2), 2025-11-07
Supplement: Supplementary file 1 [file 5d381670a7217c7b2986fb19.pdf]

## Electronic Supporting Information

# Photochemically Induced Self-Healing in a Cadmium(II) Coordination Crystal

Victoria N.P. Pham-Tran, Tristan J. L. LaCasse, Peter Gordon, Katherine M. Marczenko<sup>\*a</sup>

<sup>a</sup>Department of Chemistry, Carleton University, Ottawa, ON, Canada

Email: [katherinemarczenko@cunet.carleton.ca](mailto:katherinemarczenko@cunet.carleton.ca)

## Contents

|                                  |    |
|----------------------------------|----|
| 1 General .....                  | 2  |
| 2 Powder X-ray Diffraction ..... | 5  |
| 3 Spectroscopy .....             | 7  |
| 4 Calorimetry .....              | 11 |
| 5 X-ray Crystallography .....    | 13 |
| 6 Microscopy .....               | 18 |
| 7 References .....               | 24 |

# 1 General

## Synthetic Procedures

Manipulations were performed in air under standard atmospheric conditions. All deuterated solvents were dried and stored over activated molecular sieves (3 Å).

## Solution NMR Spectroscopy

All Nuclear Magnetic Resonance (NMR) experiments were carried out on a Bruker AV-300 spectrometer in dried deuterated solvent. Residual  $^1\text{H}$  signal of the deuterated solvent was used for chemical shift calibration of the respective experiments. The NMR data were processed using Bruker TopSpin 4.3.0.<sup>[1]</sup>

## Powder X-Ray Diffraction

Powder X-Ray Diffraction (PXRD) data were collected using a PANalytical Empyrean diffractometer in a reflection (Bragg-Brentano) geometry with Cu  $K_\alpha$  radiation source, Ni  $K_\beta$  filter and PIXcel1D linear detector. Powder diffractograms were recorded in the 5-50° 2 $\theta$  range with a step size of 0.01303°. Data collection was controlled with X'Pert Data Collector Software.<sup>[2]</sup>

## Single-Crystal X-Ray Diffraction

Single-Crystal X-Ray Diffraction (SCXRD) experiments were run on a Rigaku MiniLab II diffractometer, equipped with a Mo source ( $\lambda = 0.71 \text{ \AA}$ ) and Oxford 800 cryostream. Reflections were integrated using the CrysAlias Pro software (v43).<sup>[3]</sup> The structures were solved by intrinsic phasing and a full matrix least-squares refinement was carried out using all data in Olex2-1.5.<sup>[4]</sup> Non-hydrogen atoms were refined anisotropically, while hydrogen atoms were added in calculated positions. The crystallographic data for compounds (**1**), (**2**), (**2'**) and (**3**) are shown in Table S1. CIFs have been deposited to the Cambridge Crystallographic Data Centre (CCDC) with deposition numbers 2497061–2497064.

## UV-VIS Spectroscopy

Solution UV-VIS spectra were obtained on a Agilent Cary 100 UV-Vis spectrophotometer equipped with a diffuse reflectance accessory. A single baseline scan from 260-900 nm was performed on a 0.1 cm quartz cuvette containing the sample solvent. Sample and baseline data acquisition was performed at a 1 nm resolution set to a 'Medium' scan speed.

## Vibrational Spectroscopy

Infrared spectra were obtained on an Agilent Cary 630 FTIR ZnSe engine instrument equipped with a single-bounce diamond ATR sampling accessory, a standard globalbar source, and a DLaTGS detector.

## Differential Scanning Calorimetry

DSC experiments were performed on a TA Instruments Q10 model. The DSC was calibrated at the melting point of the indium metal (156.6 °C). All DSC samples were hermetically sealed in aluminum pans prior to analysis. All samples were heated to 400 °C with a ramp rate of 10 °C min<sup>-1</sup>, using air as the purge gas. The melting points were measured at the peak of the endothermic process.

## Atomic Force Microscopy

AFM data were obtained from a Veeco Dimension 3100 tool, using NanoScope Software. A NuNano AC mode silicon probe was used ("Scout 350 RAI", 42 N/m, 350 kHz). The data was collected in tapping mode, in air, with a scan rate of approximately 0.5 Hz. Scan size and resolution for each acquisition was 25 × 25 μm at 512 × 512 pixels. Raw data was processed and interpreted using WSxM.<sup>[5]</sup> Standard practice was to flatten the data and remove lines as necessary for clarity. Statistical data was obtained using the statistical quantities tool in Gwyddion.<sup>[6]</sup>

## Scanning Electron Microscopy

Scanning electron microscopy (SEM) measurements were performed using a Tescan VegaII XMU microscope. Prior to imaging, samples were sputter-coated with a thin conductive layer (< 10 nm) of gold (99.99%) using a Quorum Q150T ES sample preparation system to minimize charging effects and improve image quality. The coating was applied uniformly to ensure consistent conductivity across the crystal surface. SEM imaging was conducted under high-vacuum conditions with secondary electron detection to capture surface morphology and fracture features with high resolution.

## Commercial Reagents

Cd(NO<sub>3</sub>)<sub>2</sub>·4H<sub>2</sub>O and triethylamine (reagent grade) were obtained from Fisher Scientific. 2-hydroxybenzoic acid (2-ohbz) and 4-hydroxybenzoic acid (4-ohbz) was obtained from TCI America.

## Starting Materials

(E)-4-(1-naphthylvinylpyridine) (4-nvp) was synthesized according to the procedure outlined by Marczenko *et. al.*<sup>[7]</sup>

## Synthetic Procedure

Synthesis of Cd<sub>2</sub>(4-ohbz)<sub>4</sub>(4-nvp)<sub>4</sub> (**1**): 4-nvp (0.043 g, 0.185 mmol) was dissolved in 2.5 mL of methanol and carefully layered on top of a 1.0 mL deionized water solution of Cd(NO<sub>3</sub>)<sub>2</sub>·4H<sub>2</sub>O (0.029 g, 0.093 mmol) in a 4-dram vial. A solution of 4-ohbz (0.026 g, 0.188 mmol) dissolved in 2.5 mL of 95% ethanol was prepared and neutralized with NEt<sub>3</sub> (26.2 μL, 0.187 mmol). This solution was carefully layered on top of the previous two layers to form a three-layer system. The vial was wrapped in tin foil to reduce light exposure and put into a low light environment to grow yellow crystals over 4 days. <sup>1</sup>H-

NMR (DMSO- $d_6$ , 300 MHz):  $\delta$  9.83 (4H, s, OH), 8.58 (2H, d,  $J$  = 6 Hz), 8.45 (4H, d,  $J$  = 9 Hz), 8.37 (4H, d,  $J$  = 16 Hz), 7.96 (12H, m), 7.77 (16H, m), 7.60 (12H, m), 7.31 (4H, d,  $J$  = 16 Hz).

Synthesis of  $\text{Cd}_2(2\text{-ohbz})_4(4\text{-nvp})_4$  (**2**): A solution of 4-nvp (0.048 g, 0.207 mmol) dissolved in 2.5 mL of methanol was layered carefully on top of a  $\text{Cd}(\text{NO}_3)_2 \cdot 4\text{H}_2\text{O}$  (0.032 g, 0.103 mmol) solution dissolved in 1 mL of methanol in a 4-dram vial. Finally, a 2-ohbz (0.029 g, 0.209 mmol) solution dissolved in 2.5 mL of methanol and neutralized with  $\text{NEt}_3$  (30.0  $\mu\text{L}$ , 0.215 mmol) was subsequently layered. The three-layer solution was wrapped in tin foil to reduce exposure to light and put in a low light environment to grow yellow crystals over a week. The procedure can be replicated by alternatively dissolving  $\text{Cd}(\text{NO}_3)_2 \cdot 4\text{H}_2\text{O}$  and 2-ohbz in deionized water and 95% ethanol, respectively. (0.035 g, 21% yield). M.P. = 217 – 242  $^\circ\text{C}$ .  $^1\text{H-NMR}$  (DMSO- $d_6$ , 300 MHz):  $\delta$  14.17 (4H, s, OH), 8.59 (8H, d,  $J$  = 6 Hz), 8.46 (4H, d,  $J$  = 9 Hz), 8.38 (4H, d,  $J$  = 16 Hz), 8.02–7.91 (12H, m), 7.81–7.72 (12H, m), 7.66–7.53 (12H, m), 7.36–7.22 (8H, m), 6.80–6.68 (8H, m).

Synthesis of  $\text{Cd}_2(2\text{-ohbz})_4(\text{rcct-4-pncb})_2$  (rcct-4-pncb = 1,3-bis(4'-pyridyl)-2,4-bis(naphthyl)cyclobutane (**3**)): Complex (**2**) was irradiated for 45–60 minutes using a DARKBEAM 10 W, 365 nm lithium-ion battery flashlight (T7 bulb, 200 lumens).  $^1\text{H-NMR}$  (DMSO- $d_6$ , 300 MHz):  $\delta$  13.98 (4H, s, OH), 8.38 (8H, d,  $J$  = 8 Hz), 8.22 (4H, d,  $J$  = 8 Hz), 8.02 (4H, d,  $J$  = 8 Hz), 7.91–7.71 (12H, m), 7.66–7.53 (12H, m), 7.36–7.22 (8H, m), 6.78–6.72 (8H, m), 5.56 (4H, dd,  $J$  = 7 Hz, CH cyclobutane), 4.79 (4H, dd,  $J$  = 7 Hz, CH cyclobutane).

## 2 Powder X-ray Diffraction

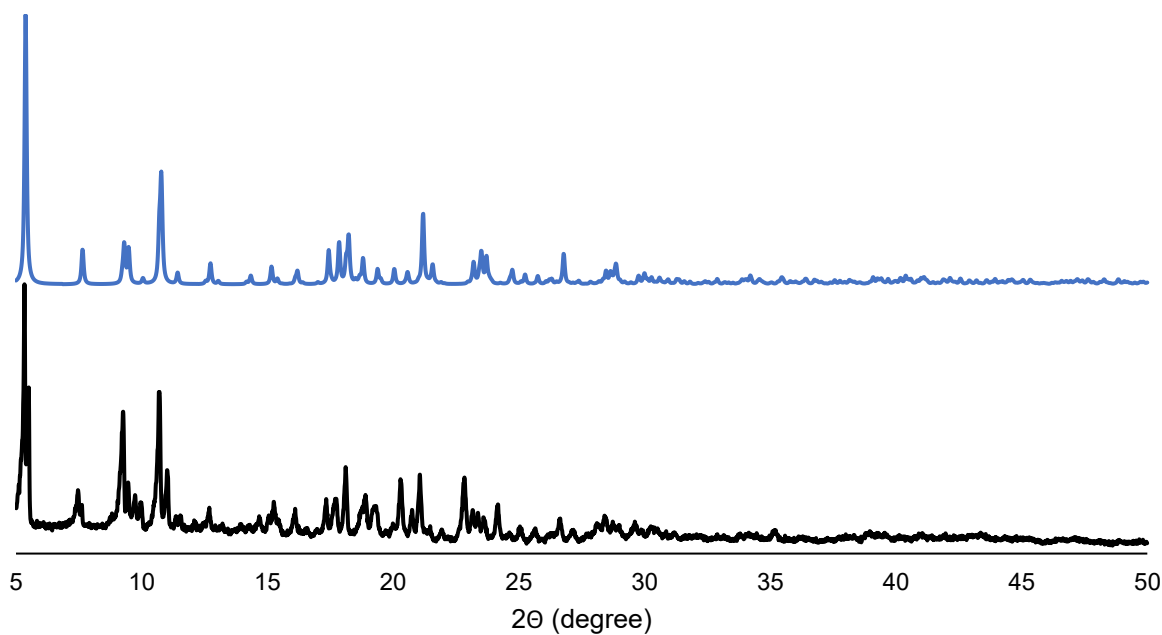

**Figure S1.** Powder X-ray Diffraction pattern of **1** (experimental, black; calculated, blue) at 293 K.

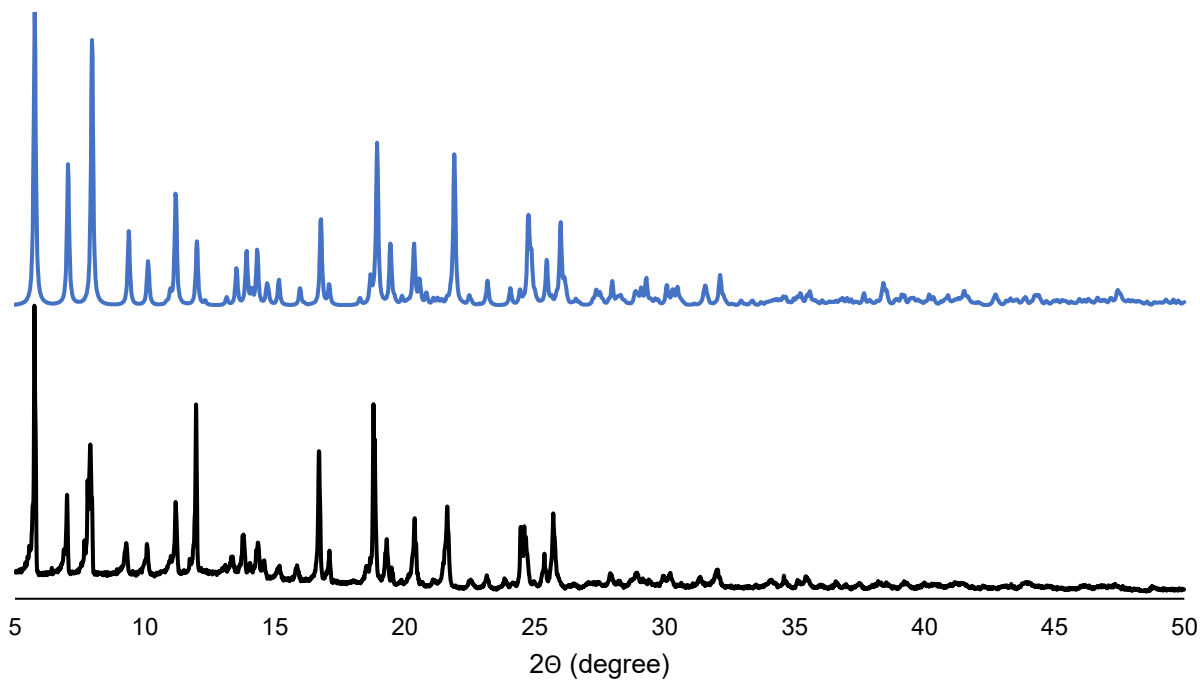

**Figure S2.** Powder X-ray Diffraction pattern of **2** (experimental, black; calculated, blue) at 293 K.

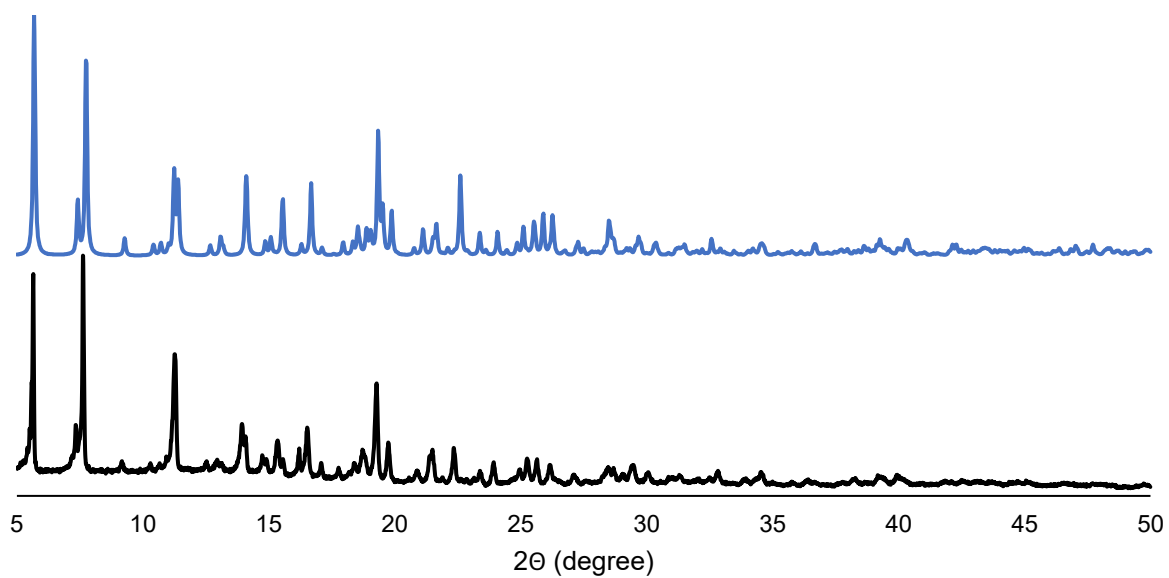

**Figure S3.** Powder X-ray Diffraction pattern of **3** (experimental, black; calculated, blue) at 293 K.

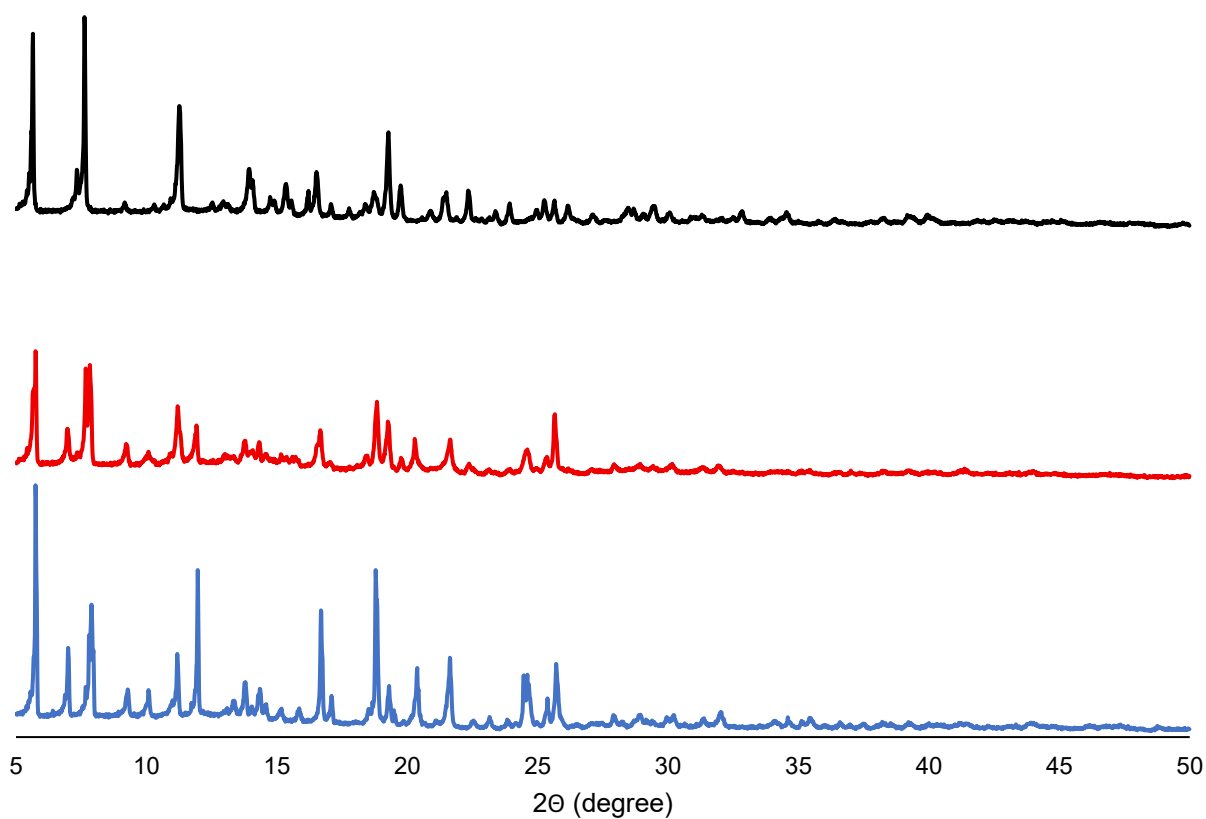

**Figure S4.** Powder X-ray Diffraction pattern of **2** at 0 min (blue), 3 min (red; **2'**) and 45 min (black; **3**) of UV-radiation at 293 K.

### 3 Spectroscopy

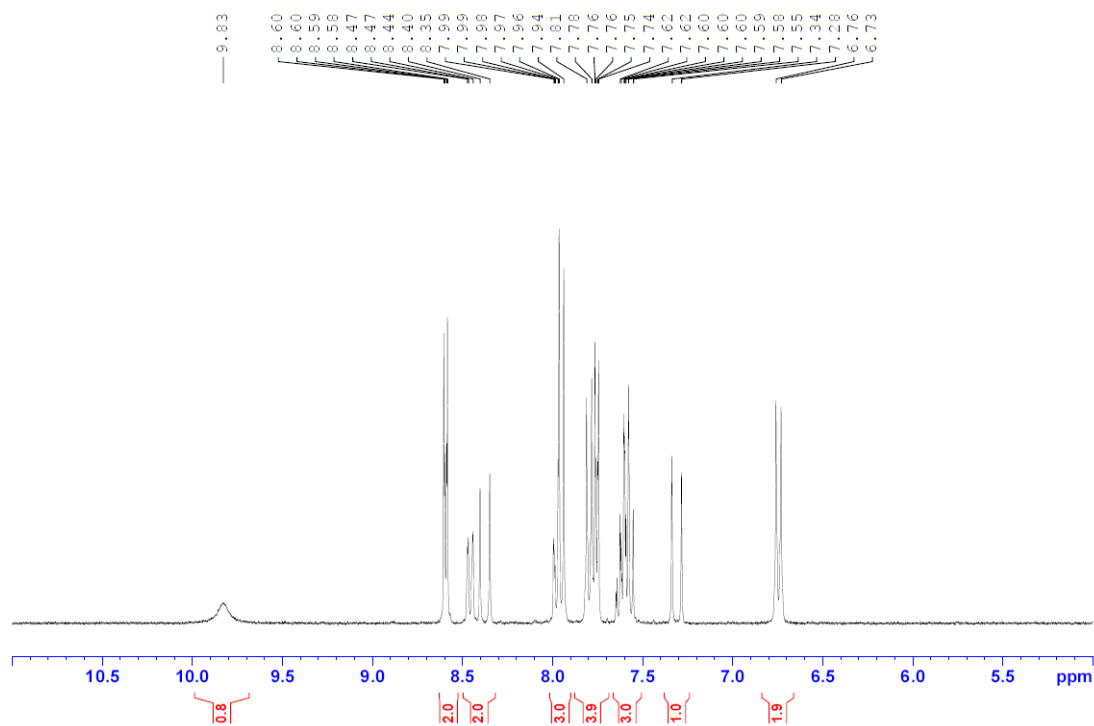

**Figure S5.**  $^1\text{H}$  NMR (300 MHz; dimethyl sulfoxide- $\text{d}_6$ ) of **1**.

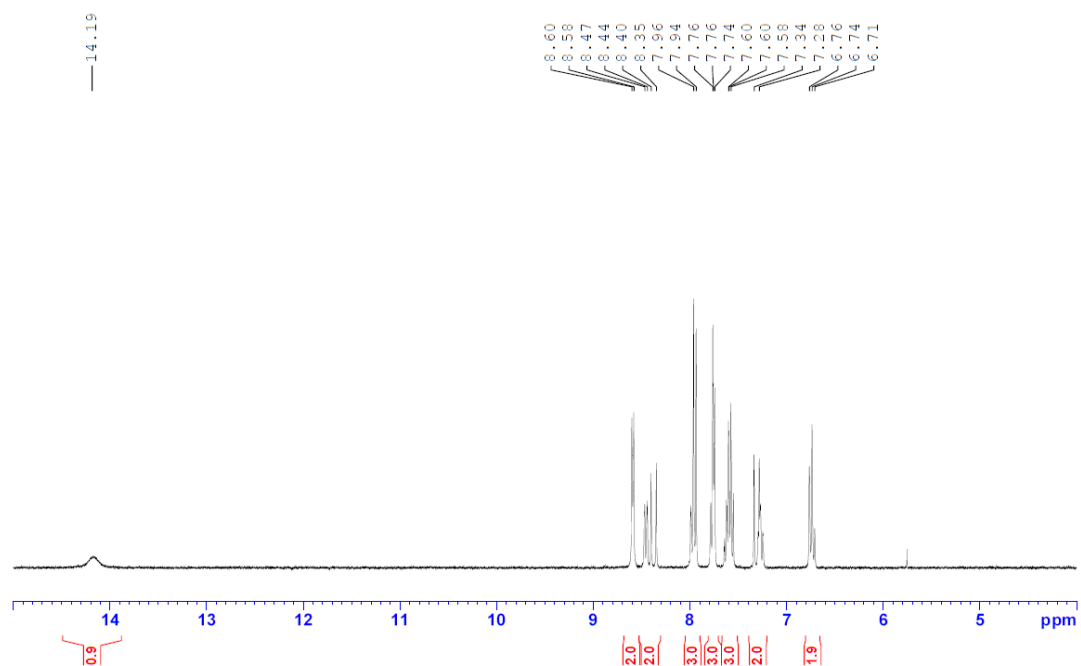

**Figure S6.**  $^1\text{H}$  NMR (300 MHz; dimethyl sulfoxide- $\text{d}_6$ ) of **2**.

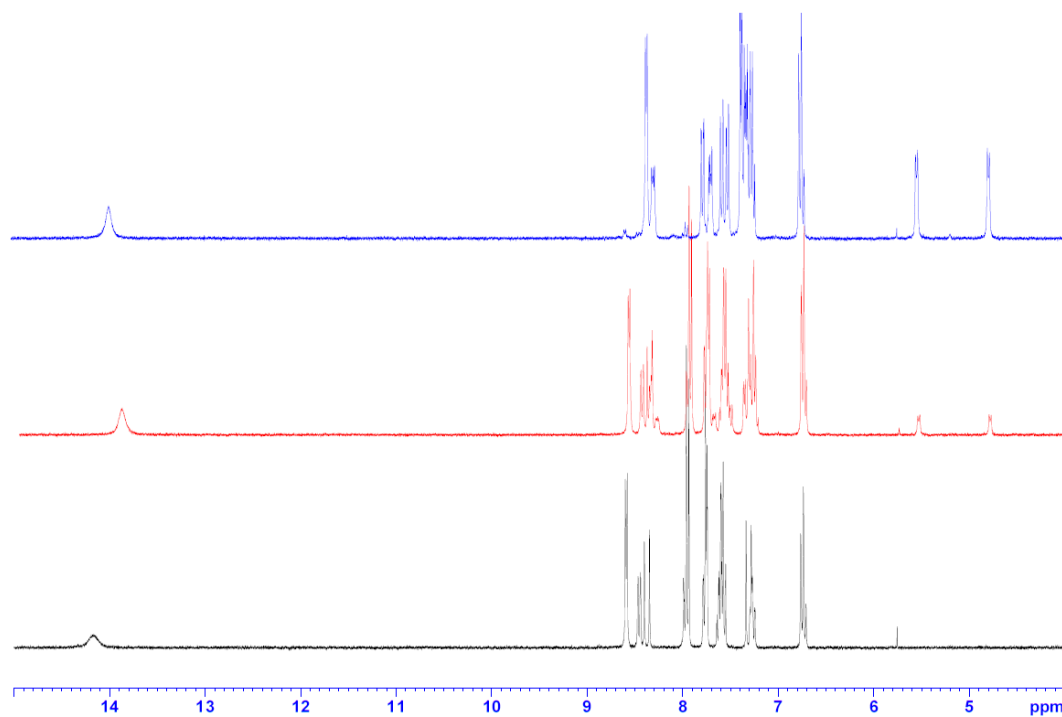

**Figure S7.**  $^1\text{H}$  NMR (300 MHz; dimethyl sulfoxide- $\text{d}_6$ ) of **2** after 0 min (black), 3 min (red), and 45 min (blue) of UV-light irradiation.

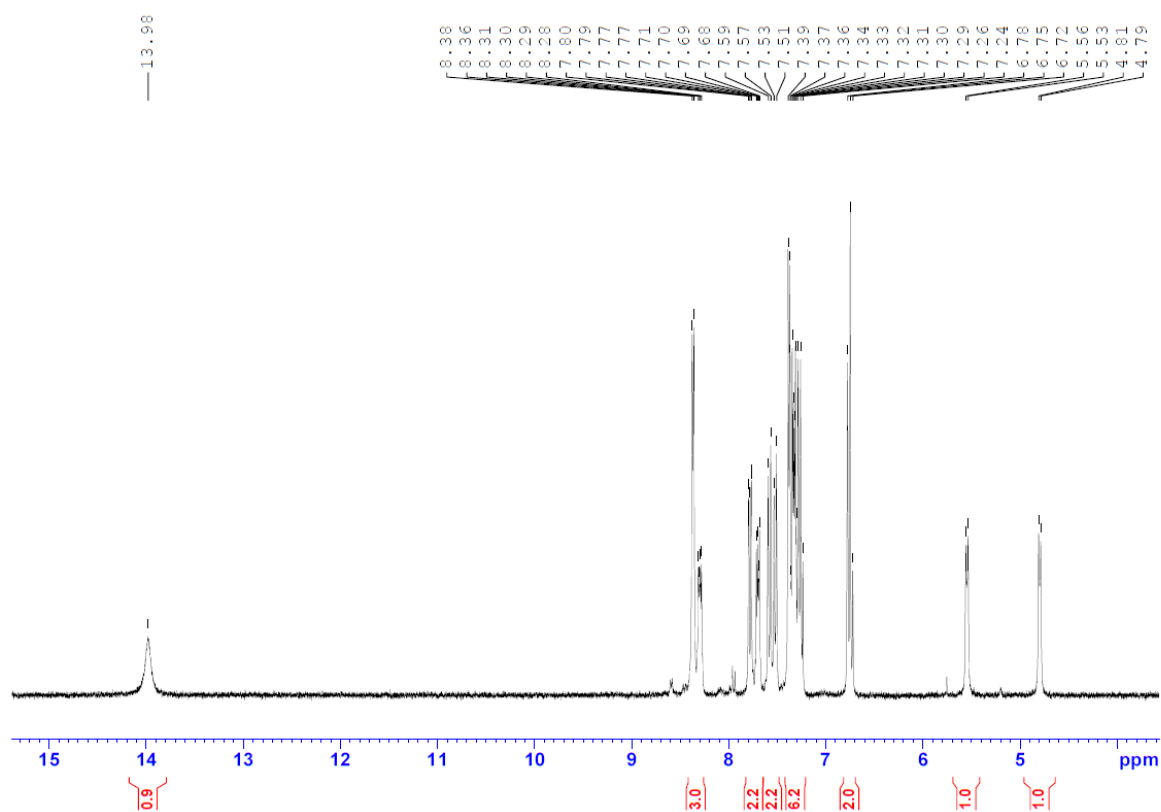

**Figure S8.**  $^1\text{H}$  NMR (300 MHz; dimethyl sulfoxide- $\text{d}_6$ ) of **3**.



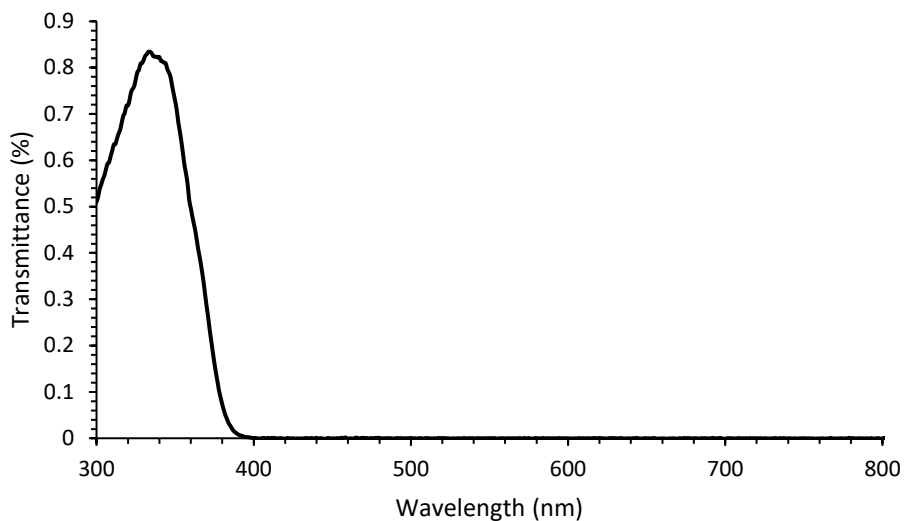

**Figure S9.** Blank corrected UV-Vis spectrum of a  $5.0 \times 10^{-5}$  M solution of **2** in DMSO ( $\lambda_{\text{max}} = 340$  nm).

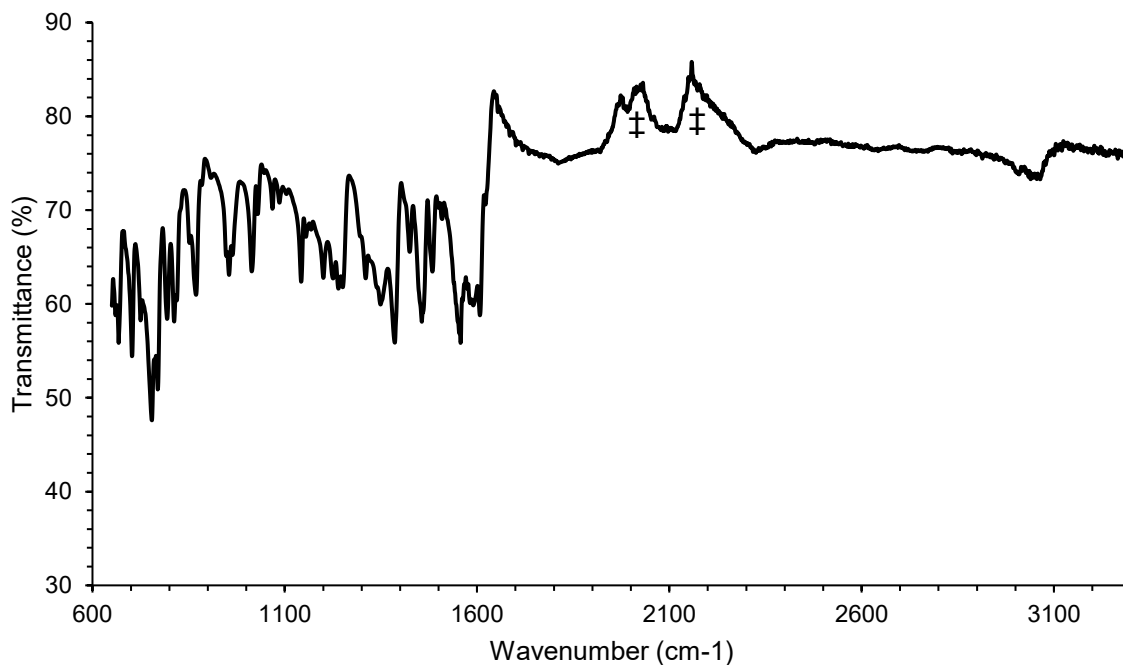

**Figure S10.** FTIR spectrum of **2**, acquired from 64 scans at  $2 \text{ cm}^{-1}$  resolution for both background and sample measurements. A Happ Genzel apodization and Mertz phase correction was applied. The symbol ‡ indicates artifacts from the diamond ATR crystal.<sup>[8]</sup>

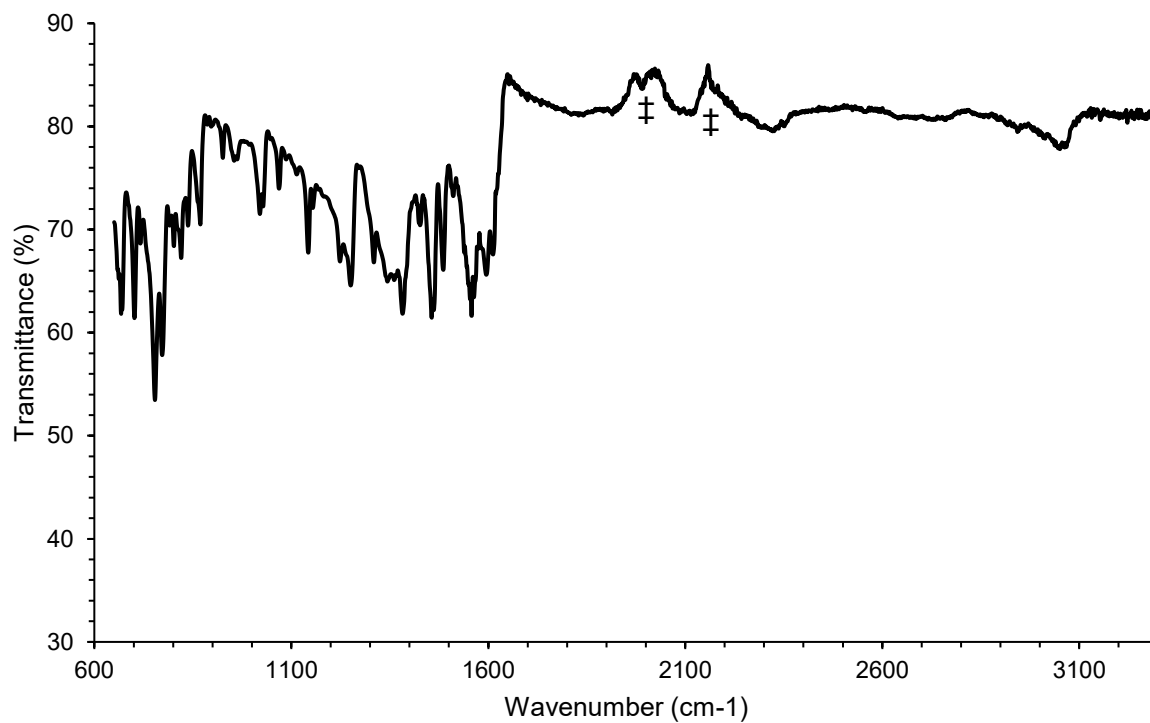

**Figure S11.** FTIR spectrum of **3**, acquired from 64 scans at  $2\text{ cm}^{-1}$  resolution for both background and sample measurements. A Happ Genzel apodization and Mertz phase correction was applied. The symbol ‡ indicates artifacts from the diamond ATR crystal.<sup>[8]</sup>

## 4 Calorimetry

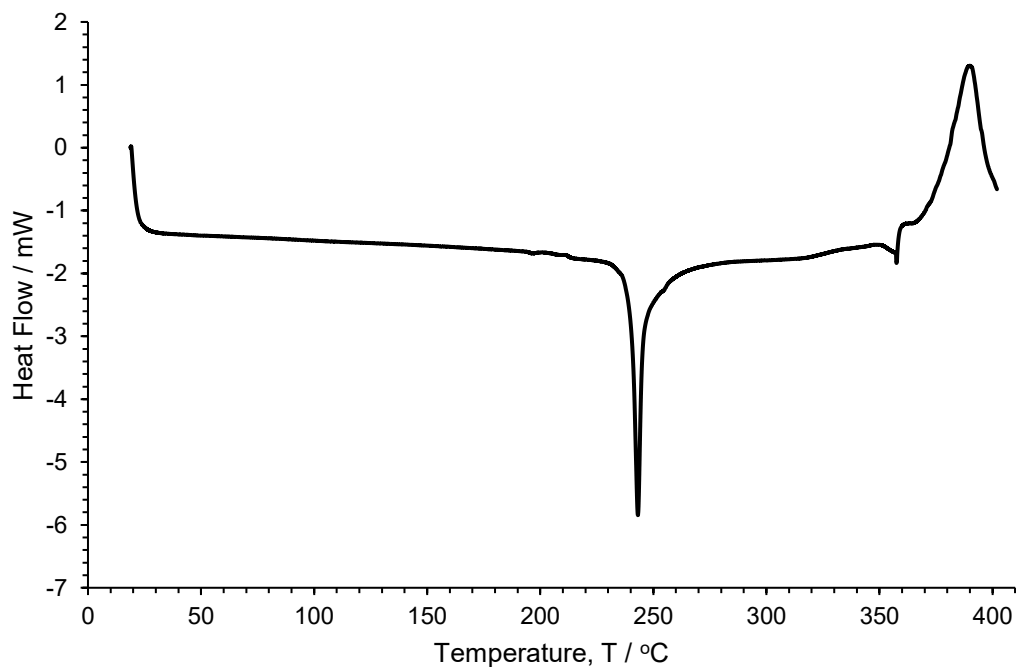

**Figure S13.** DSC thermogram of **2**. A sample size of 1.5 mg and ramp rate of 5.00 °C /min from room temperature (20.05 °C) to 400.00 °C was used.

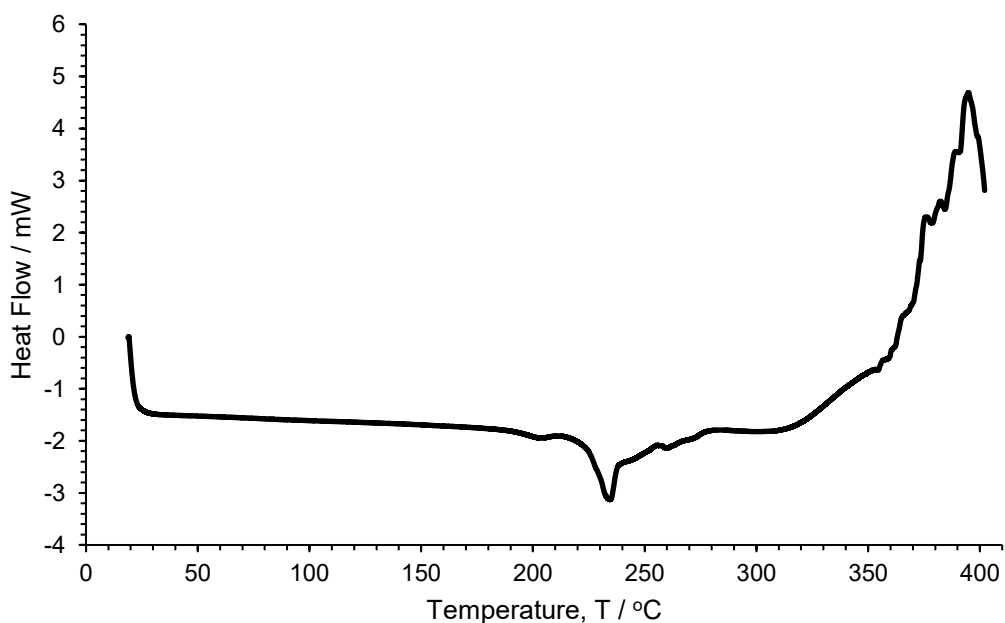

**Figure S14.** DSC thermogram of **2** after 3 min of UV-radiation (i.e. **2'**). A sample size of 1.8 mg and ramp rate of 5.00 °C /min from room temperature (20.05 °C) to 400.00 °C was used.

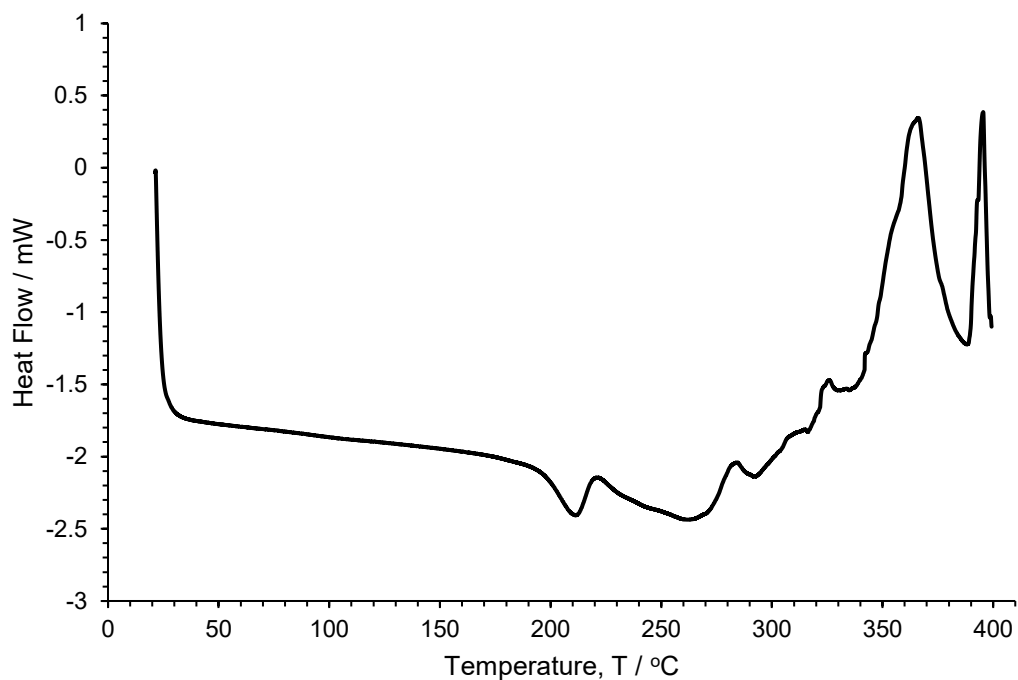

**Figure S15.** DSC thermogram of 2 after 1 hour of UV-radiation (*i.e.* 3). A sample size of 1.7 mg and ramp rate of 5.00 °C /min from room temperature (20.05 °C) to 400.00 °C was used.

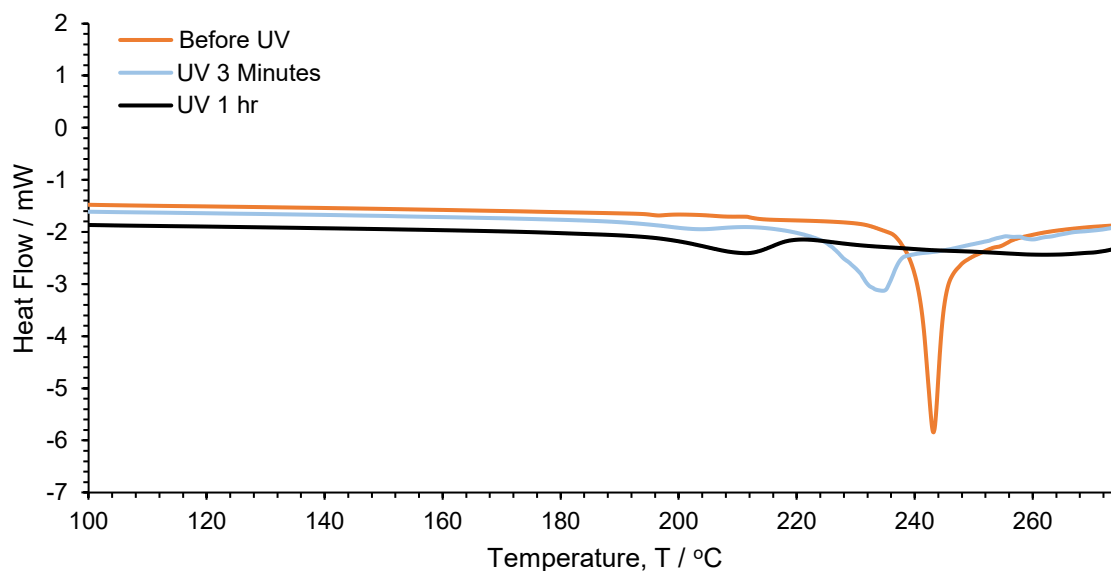

**Figure S16.** Stacked DSC thermogram of 2 after 0 min, 3 min, and 1 hour of UV-radiation.

## 5 X-ray Crystallography

**Table S1.** Crystal data and refinement parameters for (1), (2), (2'), and (3). The same crystal was used to monitor the progression from 2 → 2' → 3.

|                                             | (1)                                                                            | (2)                                                                               | (2')                                                                             | (3)                                                             |
|---------------------------------------------|--------------------------------------------------------------------------------|-----------------------------------------------------------------------------------|----------------------------------------------------------------------------------|-----------------------------------------------------------------|
| Identification code                         | Cd_FormII_115K                                                                 | VPT-i-82-115K                                                                     | VPT-i-82-365nm10W-3min-115K                                                      | VPT-i-82-365nm10W-45min-115K                                    |
| Empirical formula                           | C <sub>96</sub> H <sub>72</sub> Cd <sub>2</sub> N <sub>4</sub> O <sub>12</sub> | C <sub>96</sub> H <sub>71.24</sub> Cd <sub>2</sub> N <sub>4</sub> O <sub>12</sub> | C <sub>96</sub> H <sub>71.8</sub> Cd <sub>2</sub> N <sub>4</sub> O <sub>12</sub> | C <sub>48</sub> H <sub>36</sub> CdN <sub>2</sub> O <sub>6</sub> |
| Formula weight                              | 1698.37                                                                        | 1697.61                                                                           | 1698.17                                                                          | 849.19                                                          |
| Temperature/K                               | 140.15                                                                         | 115.00(10)                                                                        | 115.00(10)                                                                       | 115.00(10)                                                      |
| Crystal system                              | monoclinic                                                                     | triclinic                                                                         | triclinic                                                                        | triclinic                                                       |
| Space group                                 | P2 <sub>1</sub> /c                                                             | P-1                                                                               | P-1                                                                              | P-1                                                             |
| a/Å                                         | 16.4115(6)                                                                     | 9.7798(4)                                                                         | 9.8283(3)                                                                        | 9.8104(2)                                                       |
| b/Å                                         | 10.4173(4)                                                                     | 13.3815(5)                                                                        | 12.9535(8)                                                                       | 12.9237(4)                                                      |
| c/Å                                         | 23.1085(7)                                                                     | 15.7776(6)                                                                        | 16.3591(9)                                                                       | 16.4017(4)                                                      |
| α/°                                         | 90                                                                             | 76.532(3)                                                                         | 71.857(5)                                                                        | 71.569(3)                                                       |
| β/°                                         | 91.640(3)                                                                      | 88.255(3)                                                                         | 89.889(4)                                                                        | 89.871(2)                                                       |
| γ/°                                         | 90                                                                             | 74.683(3)                                                                         | 76.841(4)                                                                        | 76.937(2)                                                       |
| Volume/Å <sup>3</sup>                       | 3949.1(2)                                                                      | 1935.62(13)                                                                       | 1921.82(18)                                                                      | 1916.40(9)                                                      |
| Z                                           | 2                                                                              | 1                                                                                 | 1                                                                                | 2                                                               |
| ρ <sub>calc</sub> /g/cm <sup>3</sup>        | 1.428                                                                          | 1.456                                                                             | 1.467                                                                            | 1.472                                                           |
| μ/mm <sup>-1</sup>                          | 0.607                                                                          | 0.619                                                                             | 0.623                                                                            | 0.625                                                           |
| F(000)                                      | 1736.0                                                                         | 867.0                                                                             | 868                                                                              | 868.0                                                           |
| Crystal size/mm <sup>3</sup>                | 0.345 × 0.212 × 0.088                                                          | 0.41 × 0.18 × 0.08                                                                | 0.36 × 0.14 × 0.1                                                                | 0.35 × 0.13 × 0.11                                              |
| Radiation/Å                                 | MoKα (λ = 0.71073)                                                             | Mo Kα (λ = 0.71073)                                                               | Mo Kα (λ = 0.71073)                                                              | Mo Kα (λ = 0.71073)                                             |
| 2θ range for data collection/°              | 4.632 to 62.014                                                                | 4.32 to 52.83                                                                     | 4.784 to 52.868                                                                  | 4.274 to 52.842                                                 |
| Index ranges                                | -23 ≤ h ≤ 23, -14 ≤ k ≤ 14, -33 ≤ l ≤ 32                                       | -12 ≤ h ≤ 12, -16 ≤ k ≤ 16, -19 ≤ l ≤ 19                                          | -12 ≤ h ≤ 12, -15 ≤ k ≤ 16, -20 ≤ l ≤ 20                                         | -12 ≤ h ≤ 12, -16 ≤ k ≤ 16, -20 ≤ l ≤ 20                        |
| Reflections collected                       | 44601                                                                          | 31694                                                                             | 31068                                                                            | 44615                                                           |
| Independent reflections                     | 11961 [R <sub>int</sub> = 0.0691, R <sub>sigma</sub> = 0.1077]                 | 7859 [R <sub>int</sub> = 0.0417, R <sub>sigma</sub> = 0.0396]                     | 7788 [R <sub>int</sub> = 0.0648, R <sub>sigma</sub> = 0.0842]                    | 7774 [R <sub>int</sub> = 0.0416, R <sub>sigma</sub> = 0.0351]   |
| Data/restraints/parameters                  | 11961/3/516                                                                    | 7859/53/581                                                                       | 7788/620/608                                                                     | 7774/551/582                                                    |
| Goodness-of-fit on F <sup>2</sup>           | 1.008                                                                          | 1.017                                                                             | 1.078                                                                            | 1.036                                                           |
| Final R indexes [I>=2σ(I)] <sup>a,b</sup>   | R <sub>1</sub> = 0.0560, wR <sub>2</sub> = 0.1074                              | R <sub>1</sub> = 0.0321, wR <sub>2</sub> = 0.0721                                 | R <sub>1</sub> = 0.0611, wR <sub>2</sub> = 0.1249                                | R <sub>1</sub> = 0.0297, wR <sub>2</sub> = 0.0629               |
| Final R indexes [all data] <sup>a,b</sup>   | R <sub>1</sub> = 0.1151, wR <sub>2</sub> = 0.1255                              | R <sub>1</sub> = 0.0428, wR <sub>2</sub> = 0.0757                                 | R <sub>1</sub> = 0.0947, wR <sub>2</sub> = 0.1347                                | R <sub>1</sub> = 0.0405, wR <sub>2</sub> = 0.0664               |
| Largest diff. peak/hole / e Å <sup>-3</sup> | 1.64/-0.94                                                                     | 0.73/-0.71                                                                        | 1.60/-1.16                                                                       | 0.97/-0.84                                                      |

$${}^aR_1 = \frac{\sum |F_o - F_c|}{\sum |F_o|} \quad {}^bWR_2 = \sqrt{\frac{\sum w(F_o - F_c)^2}{\sum w(F_o)^2}}$$

**Table S2.** Summary of crystallographic parameters of **2**, before (0 min), during (**2'**, 3 min; “Cracks”), and after irradiation (**3**, 45 min; “Healed”) at 115 K.

| Parameter                       | <b>2</b><br>0 min | <b>2'</b><br>3 min<br>(“Cracked”) | <b>3</b><br>45 min<br>(“Healed”) | $\Delta(2 \rightarrow 2') \text{ \% } \pm \sigma$ | $\Delta(2' \rightarrow 3) \text{ \% } \pm \sigma$ | $\Delta(0 \rightarrow 45 \text{ min}) \text{ \% } \pm \sigma$ |
|---------------------------------|-------------------|-----------------------------------|----------------------------------|---------------------------------------------------|---------------------------------------------------|---------------------------------------------------------------|
| <b>a</b> (Å)                    | 9.7798(4)         | 9.8283(3)                         | 9.8104(2)                        | +0.496 ± 0.0051                                   | −0.182 ± 0.0037                                   | +0.313 ± 0.0046                                               |
| <b>b</b> (Å)                    | 13.3815(5)        | 12.9535(8)                        | 12.9237(4)                       | −3.198 ± 0.0070                                   | −0.230 ± 0.0069                                   | −3.421 ± 0.0047                                               |
| <b>c</b> (Å)                    | 15.7776(6)        | 16.3591(9)                        | 16.4017(4)                       | +3.686 ± 0.0069                                   | +0.260 ± 0.0060                                   | +3.956 ± 0.0047                                               |
| <b>α</b> (°)                    | 76.532(3)         | 71.857(5)                         | 71.569(3)                        | −6.109 ± 0.0075                                   | −0.401 ± 0.0081                                   | −6.485 ± 0.0054                                               |
| <b>β</b> (°)                    | 88.255(3)         | 89.889(4)                         | 89.871(2)                        | +1.851 ± 0.0057                                   | −0.020 ± 0.0050                                   | +1.831 ± 0.0041                                               |
| <b>γ</b> (°)                    | 74.683(3)         | 76.841(4)                         | 76.937(2)                        | +2.890 ± 0.0068                                   | +0.125 ± 0.0058                                   | +3.018 ± 0.0049                                               |
| <b>Volume</b> (Å <sup>3</sup> ) | 1935.62(14)       | 1921.82(18)                       | 1916.40(9)                       | −0.713 ± 0.0117                                   | −0.282 ± 0.0104                                   | −0.993 ± 0.0085                                               |

$$\Delta X (\%) = \frac{(X_2 - X_1)}{|X_1|} \times 100$$

**Equation S1.** Percent change was calculated according to the above equation, where  $X_1$  is value 1 and  $X_2$  is value 2, and  $\Delta X$  is the calculated change value in percent.

$$\Delta \sigma = \left( \frac{X_2}{X_1} \right) \sqrt{\left( \frac{\sigma_1}{X_1} \right)^2 + \left( \frac{\sigma_2}{X_2} \right)^2} \times 100$$

**Equation S2.** Formula used for propagation of uncertainty in **Table S4**.

Uncertainties in the percent change values were determined by propagation of errors from the standard deviations of the refined crystallographic parameters. Percent changes were calculated using equation s1, where  $x_1$  and  $x_2$  are the refined values of each parameter before and after irradiation, respectively. The corresponding uncertainties were obtained using equation S2. All uncertainties are reported at the one-sigma ( $1\sigma$ ) confidence level and are rounded to two significant digits. Percent change values are presented to three decimal places to reflect the propagated precision and to prevent rounding of small uncertainties to zero. The same method was applied for both stepwise (0 → 3 min, 3 → 45 min) and cumulative (0 → 45 min) changes. Because the number of formula units per unit cell ( $Z$ ) remains constant across all structures, the propagated uncertainty for  $\Delta(V/Z)$  is identical to that for  $\Delta(V)$ .

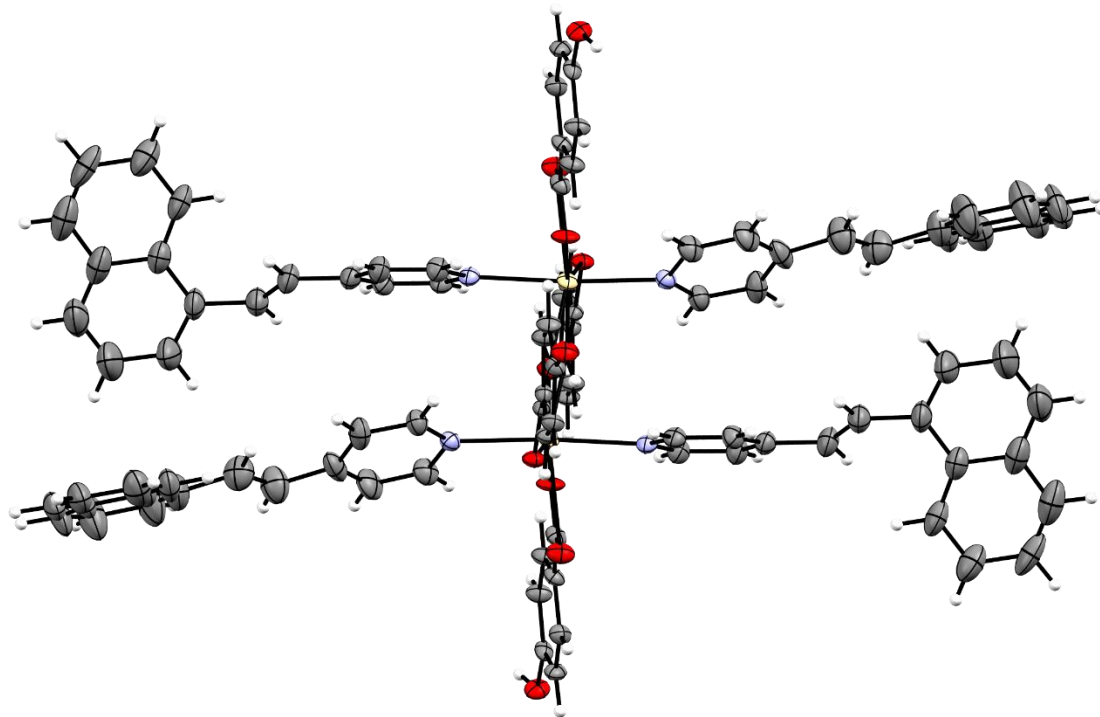

**Figure S17.** Single crystal x-ray structure of **1**. The molecular unit is shown and thermal ellipsoids are drawn at the 50% probability level.

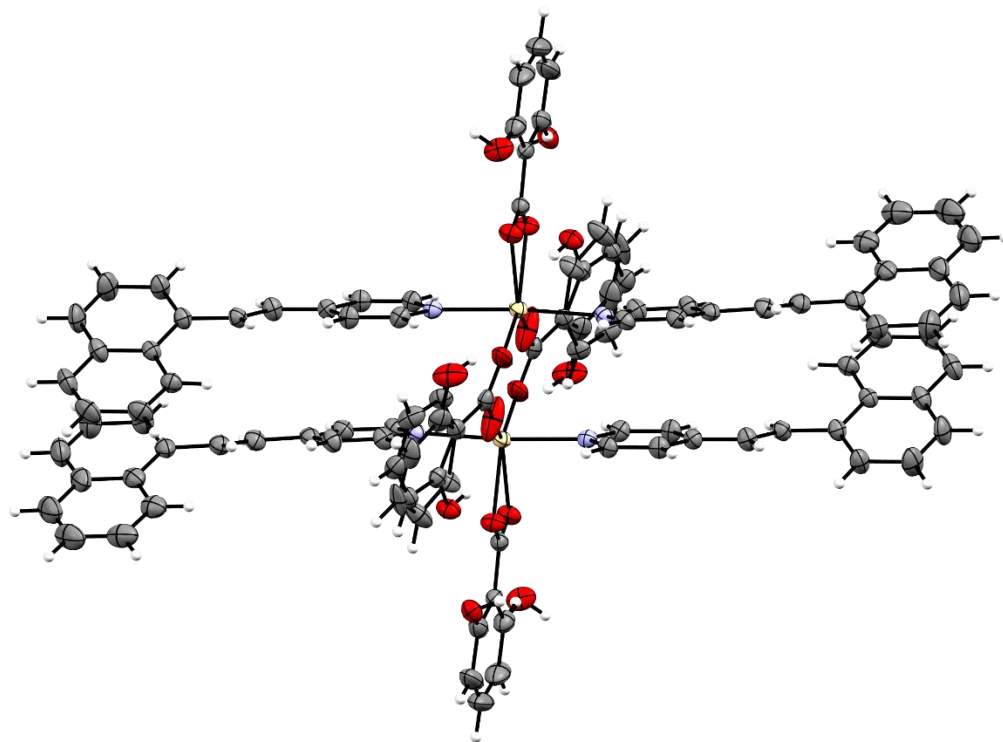

**Figure S18.** Single crystal x-ray structure of **2**. The molecular unit is shown and thermal ellipsoids are drawn at the 50% probability level.

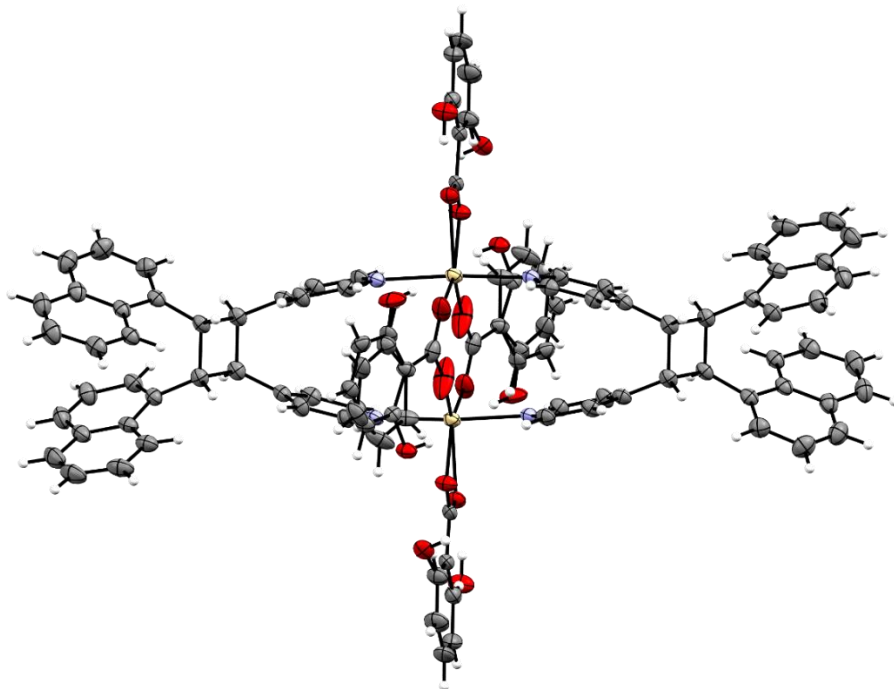

**Figure S19.** Single crystal x-ray structure of **3**. The molecular unit is shown and thermal ellipsoids are drawn at the 50% probability level.

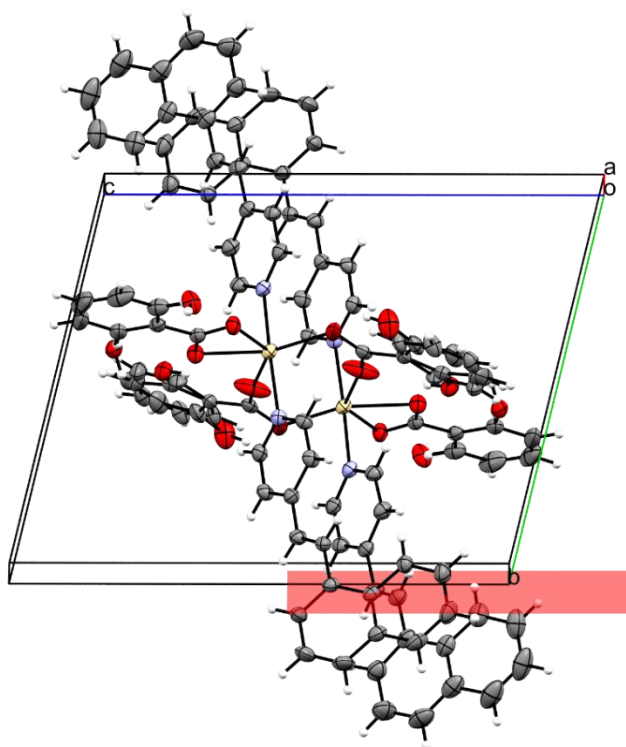

**Figure S20.** Single crystal x-ray structure of **3**. The molecular unit is shown and thermal ellipsoids are drawn at the 50% probability level.



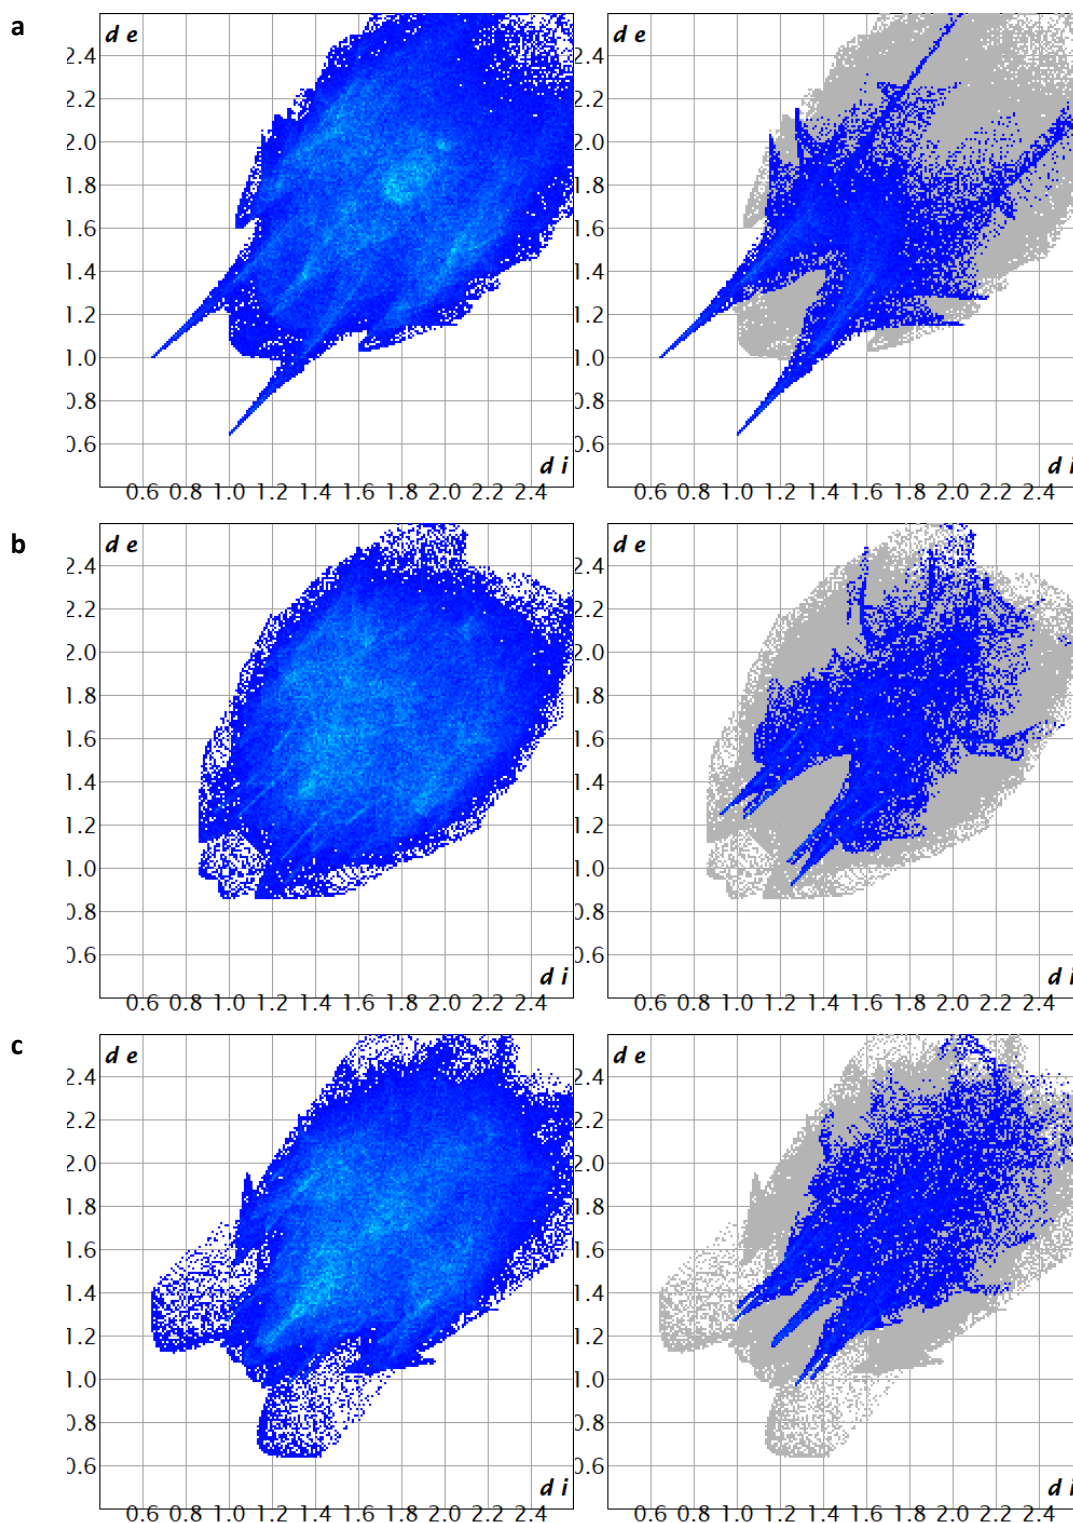

**Figure S21.** Two-dimensional fingerprint plot for compounds **1**, **2**, and **3** showing all interactions (left) and O...H interactions (right). The  $d_i$  and  $d_e$  values are the closest internal and external distances (in Å) from given points on the Hirshfeld surface.

## 6 Microscopy

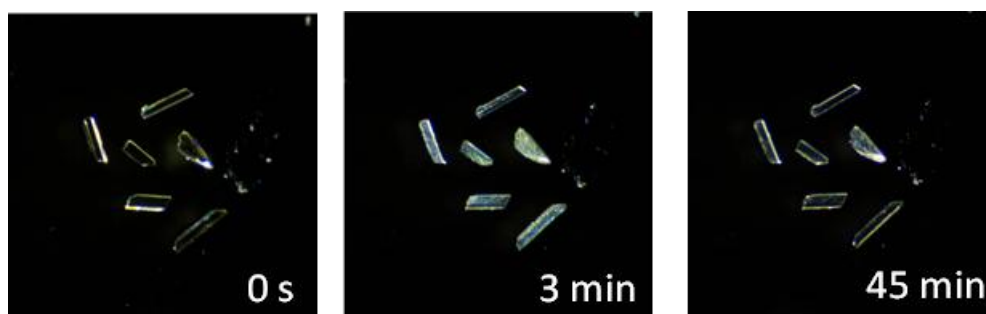

**Figure S22.** A series of photographs taken on Zeiss Stereomicroscope Stemi 305 under darkfield.

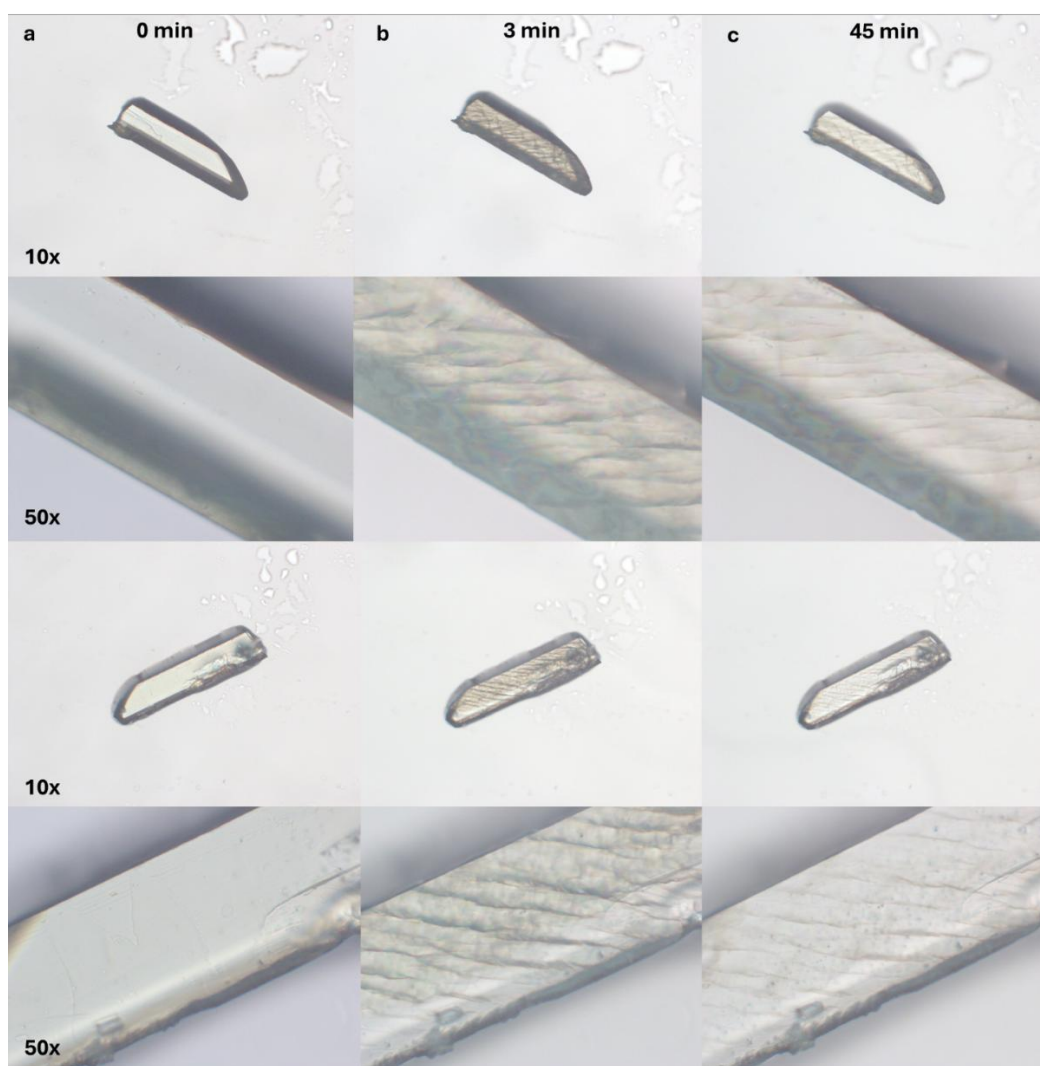

**Figure S23.** A series of photographs taken on Mitutoyo Japan Ultraplan FS110 equipped with a Lumenera Infinity 2 camera.

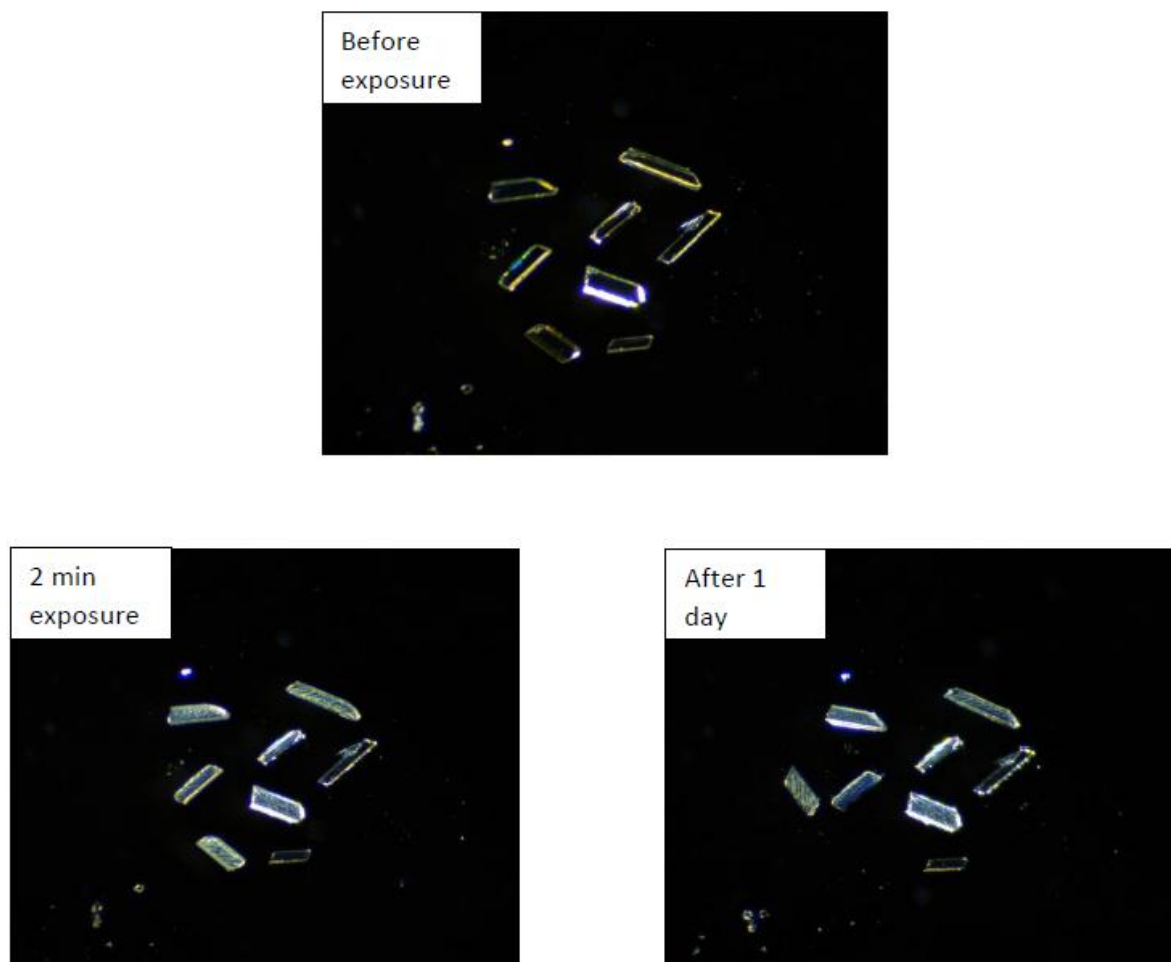

**Figure S24.** Optical images of crystals of **2** collected after (a) 2 min of UV irradiation and (b) following a 30 min rest period in the absence of UV light taken on Zeiss Stereomicroscope Stemi 305 under darkfield.

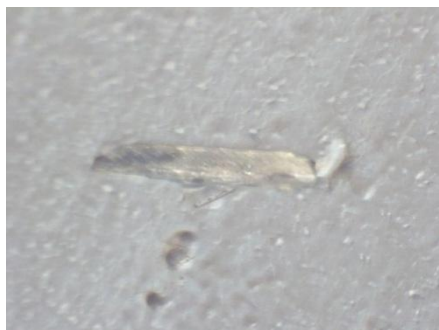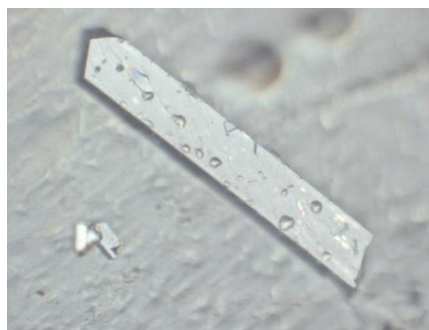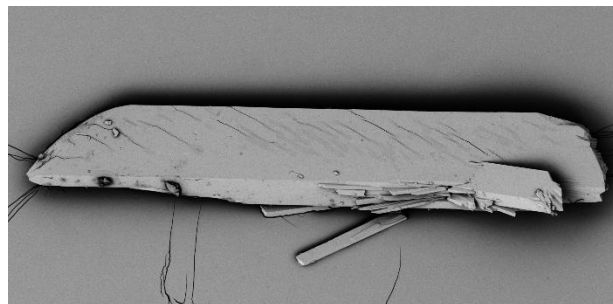

SEM MAG: 800 x  
Det: BSE  
View field: 595.2  $\mu$ m  
SEM HV: 5.00 kV  
WD: 9.832 mm  
Date(m/d/y): 10/08/25

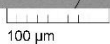

VEGA\\ TESCAN

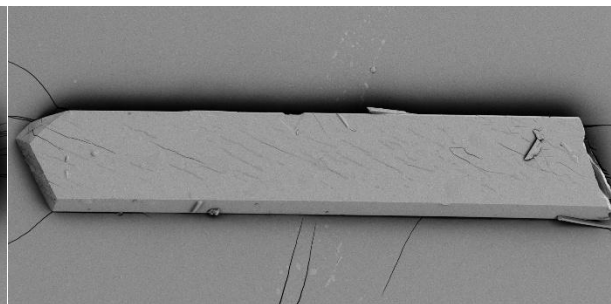

SEM MAG: 1.00 kx  
Det: BSE  
View field: 476.2  $\mu$ m  
SEM HV: 5.00 kV  
WD: 9.821 mm  
Date(m/d/y): 10/08/25

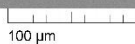

VEGA\\ TESCAN

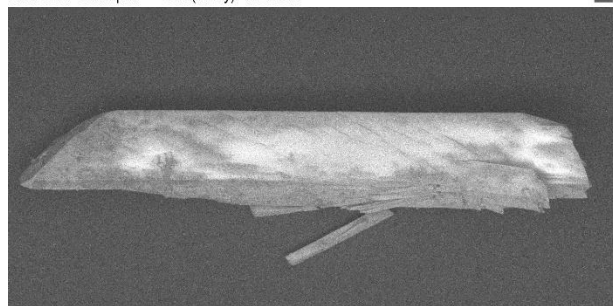

SEM MAG: 800 x  
Det: BSE  
View field: 595.2  $\mu$ m  
SEM HV: 3.00 kV  
WD: 9.715 mm  
Date(m/d/y): 10/08/25

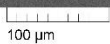

VEGA\\ TESCAN

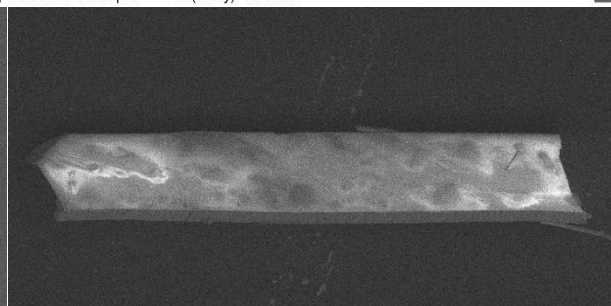

SEM MAG: 1.00 kx  
Det: BSE  
View field: 476.2  $\mu$ m  
SEM HV: 3.00 kV  
WD: 8.907 mm  
Date(m/d/y): 10/08/25

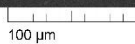

VEGA\\ TESCAN

**Figure S25.** Optical (top) and SEM images (below) of fractured crystals of  $\text{Cd}_2(2\text{-ohbz})_4(4\text{-nvp})_4$ . The optical micrograph images show the as-prepared crystals prior to coating.

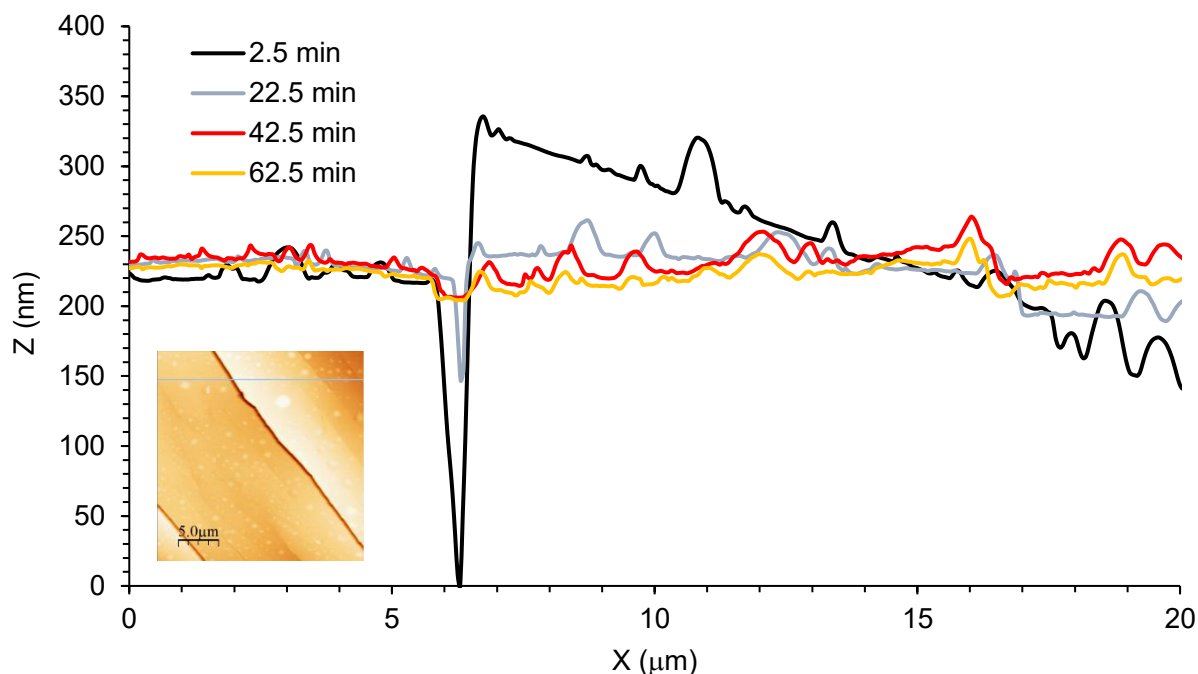

**Figure S26.** AFM line profile analysis of  $\text{Cd}_2(4\text{-nvp})_4(2\text{-ohbz})_4$  crystals following UV irradiation for 2.5-, 22.5-, 42.5-, and 62.5-min. Plots of height ( $z$ , nm) versus lateral distance ( $x$ ,  $\mu\text{m}$ ) were obtained from the line indicated in the representative AFM image ( $25\text{ }\mu\text{m} \times 25\text{ }\mu\text{m}$  scan).

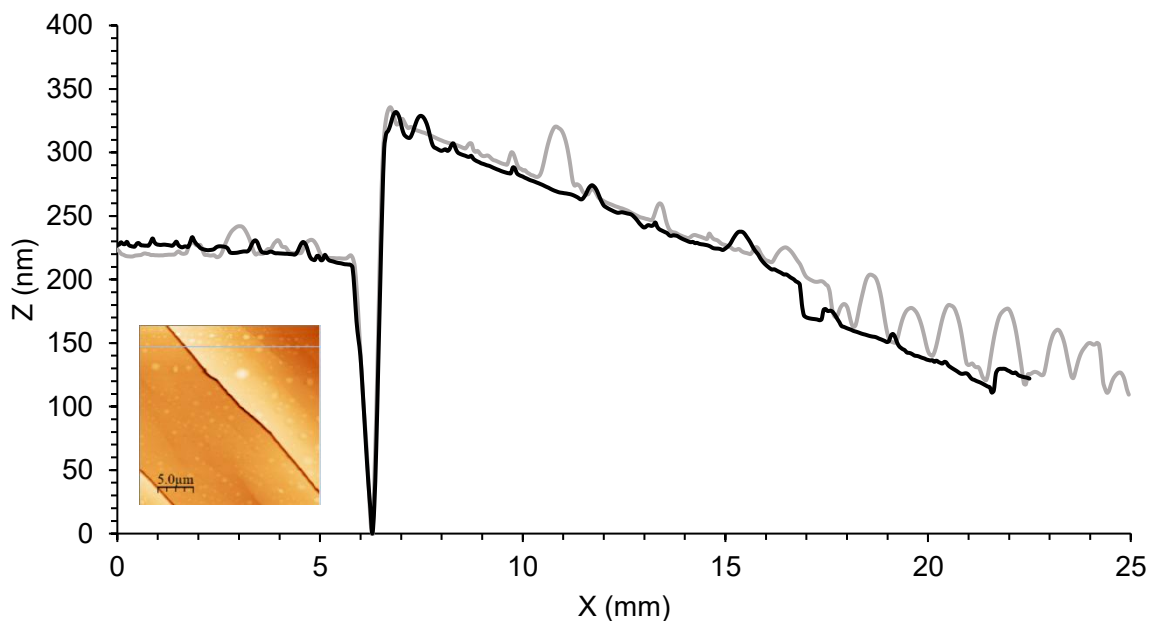

**Figure S27.** AFM line profile analysis of  $\text{Cd}_2(4\text{-nvp})_4(2\text{-ohbz})_4$  crystals following UV irradiation for 2.5 min (grey) and a rest period of 50 min (black). Plots of height ( $z$ , nm) versus lateral distance ( $x$ ,  $\mu\text{m}$ ) were obtained from the line indicated in the representative AFM image ( $25\text{ }\mu\text{m} \times 25\text{ }\mu\text{m}$  scan).

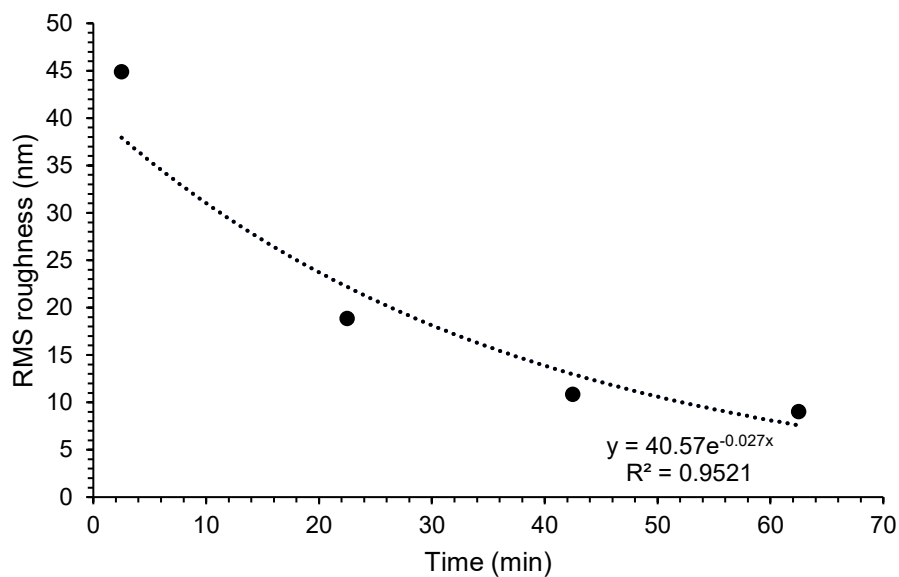

**Figure S28.** Time-dependent decay of RMS surface roughness ( $S_q$ ) measured by AFM. The data were fitted to an exponential decay function  $y = y_0 e^{-kx}$ .

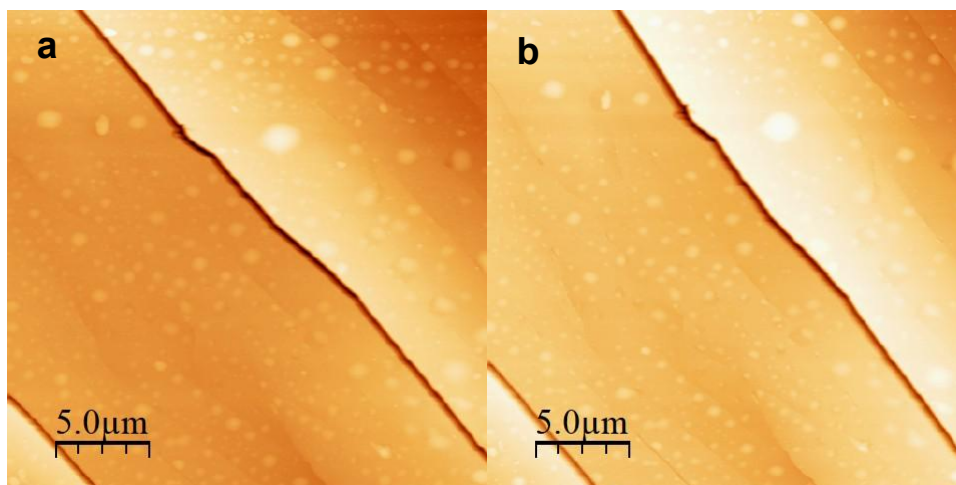

**Figure S29.** Topographic atomic force microscopy (AFM) images of the crystal surface of (2) collected after (a) 2.5 min of UV irradiation and (b) following a 50 min rest period in the absence of UV light.



**Table S3.** Statistical surface parameters obtained from AFM analysis of a single crystal of  $\text{Cd}_2(4\text{-nvp})_4(2\text{-ohbz})_4$  following sequential UV irradiation and rest periods. AFM scans were collected after an initial 2.5 min UV exposure, after a 50 min rest in ambient light, and after three additional UV irradiation intervals of 20 min each (22.5-, 42.5-, and 62.5-min total exposure).

|                                            | 2.5 min  | 2.5 min<br>(rest) | 22.5 min | 42.5 min  | 62.5 min |
|--------------------------------------------|----------|-------------------|----------|-----------|----------|
| Average value (nm)                         | 0        | 0                 | 0        | 0         | 0        |
| RMS roughness ( $S_q$ ; nm)                | 52.1514  | 44.8881           | 18.8448  | 10.8498   | 9.01935  |
| RMS (grain-wise; nm)                       | 52.1514  | 44.8881           | 18.8448  | 10.8498   | 9.01935  |
| Mean roughness ( $S_a$ ; nm)               | 38.7888  | 31.6673           | 13.4431  | 7.5926    | 6.35289  |
| Skew ( $S_{sk}$ )                          | -0.30071 | -0.68068          | -0.58632 | 0.809425  | 0.515816 |
| Excess kurtosis                            | 2.13654  | 3.57195           | 4.54622  | 6.25525   | 4.69789  |
| Minimum (nm)                               | -305.323 | -313.694          | -193.865 | -139.599  | -88.123  |
| Maximum (nm)                               | 212.261  | 135.588           | 84.576   | 82.099    | 66.135   |
| Median (nm)                                | -9.978   | -5.824            | -0.391   | -0.04     | 0.102    |
| Maximum peak height ( $S_p$ ; nm)          | 212.261  | 135.588           | 84.576   | 82.099    | 66.135   |
| Maximum pit depth ( $S_v$ ; nm)            | 305.323  | 313.694           | 193.865  | 139.599   | 88.123   |
| Maximum height ( $S_z$ ; nm)               | 517.584  | 449.282           | 278.441  | 221.697   | 154.258  |
| Surface area ( $\text{mm}^2$ )             | 635.118  | 632.832           | 628.812  | 626.888   | 625.924  |
| Surface slope ( $S_{dq}$ ; $\text{mm}^2$ ) | 0.20839  | 0.178222          | 0.125324 | 0.0803222 | 0.05583  |
| Volume ( $\text{pm}^3$ )                   | 898.67   | -345.332          | -301.787 | 21.2046   | 260.829  |
| Variation ( $\text{mm}^2$ )                | 51.5928  | 43.1005           | 33.9305  | 37.5159   | 25.2749  |
| Inclination $\theta$ (deg)                 | 0.33     | 0.31              | 0.07     | 0.01      | 0        |
| Inclination $\phi$ (deg)                   | 144.36   | 151.26            | 137.08   | 188.9     | 192.04   |
| Scan line discrepancy                      | 0.045317 | 0.039015          | 0.136059 | 0.214277  | 0.157814 |

## 7 References

1. Bruker Biospin. *TopSpin Software*, Version 4.0.7; Bruker Biospin GmbH: Karlsruhe, Germany, 2017.
2. PANalytical. *X'Pert Data Collector Software*, Version 5.3.0.62; PANalytical B.V.: Almelo, Netherlands, 2015.
3. Agilent. *CrysAlis PRO*; Agilent Technologies Ltd.: Yarnton, Oxfordshire, England, 2014.
4. Dolomanov, O. V.; Bourhis, L. J.; Gildea, R. J.; Howard, J. A. K.; Puschmann, H. *J. Appl. Crystallogr.* **2009**, *42*, 339–341.
5. Horcas, I.; Fernández, R.; Gómez-Rodríguez, J. M.; Colchero, J.; Gómez-Herrero, J.; Baró, A. M. *Rev. Sci. Instrum.* **2007**, *78*, 013705.
6. Nečas, D.; Klapetek, P. *Cent. Eur. J. Phys.* **2012**, *10* (1), 181–188.
7. Moffat, J. G. D.; Pham-Tran, V. N. P.; Marczenko, K. M. *Can. J. Chem.* **2024**, *102*, 794–801.
8. Yan, B.; Jia, X.; Sun, S.; Zhou, Z.; Fang, C.; Chen, N.; Li, Y.; Li, Y.; Ma, H. *Int. J. Refract. Met. Hard Mater.* **2015**, *48*, 56–60.
